# Supplementary material for: Functional genome-wide short hairpin RNA library screening identifies key molecules for extracellular vesicle secretion from microglia
Source: PubMed Central journal article supplement — Cell Rep. Author manuscript; Available in PMC 2022 May 26. (PMC9133589; doi:10.1016/j.celrep.2022.110791), 2022-05-10
Supplement: NIHMS1806832-supplement-1.pdf [file NIHMS1806832-supplement-1.pdf]

**Cell Reports, Volume 39**

**Supplemental information**

**Functional genome-wide short hairpin**

**RNA library screening identifies key molecules**

**for extracellular vesicle secretion from microglia**

**Zhi Ruan, Kayo Takamatsu-Yukawa, Yuzhi Wang, Margaret L. Ushman, Adam Thomas Labadorf, Maria Ericsson, Seiko Ikezu, and Tsuneya Ikezu**

## Supplementary information

### **Functional genome-wide short-hairpin RNA library screening identifies key molecules for extracellular vesicle secretion from microglia**

Zhi Ruan<sup>1,2</sup>, Kayo Takamatsu-Yukawa<sup>2</sup>, Yuzhi Wang<sup>2</sup>, Margaret L. Ushman<sup>1</sup>, Adam Thomas Labadorf<sup>3,4</sup>, Maria Ericsson<sup>5</sup>, Seiko Ikezu<sup>1</sup> and Tsuneya Ikezu<sup>1,2#</sup>

<sup>1</sup>Department of Neuroscience, Mayo Clinic Florida, Jacksonville, FL 32224, USA; <sup>2</sup>Department of Pharmacology & Experimental Therapeutics and <sup>3</sup>Neurology, Boston University School of Medicine, Boston, MA 02118, USA; <sup>4</sup>Bioinformatics Program, Boston University, Boston, MA 02118, USA; <sup>5</sup>Department of Cell Biology, Harvard Medical School, Boston, MA 02115, USA

#Corresponding Author: Tsuneya Ikezu ([ikezu.tsuneya@mayo.edu](mailto:ikezu.tsuneya@mayo.edu))

**Supplemental Table S1.** Number of barcodes and range of sequence frequencies identified in uninfected-, tdTomato<sup>high</sup>- TurboGFP<sup>high</sup> cells.

**Supplemental Table S2.** Functional annotation clusters identified by DAVID bioinformatics resource among hits enriched in cells that resisted ATP stimulation.

**Supplemental Table S3.** Hits belonging to the integral component of the membrane and plasma membrane cluster identified with the DAVID bioinformatics database.

**Supplemental Table S4.** The sequence information of lentivirus packaged shRNAs were used in this study.

**Supplemental Table S5.** The quantification of the colocalization of CD63-tdtomato and early or late endosome markers.

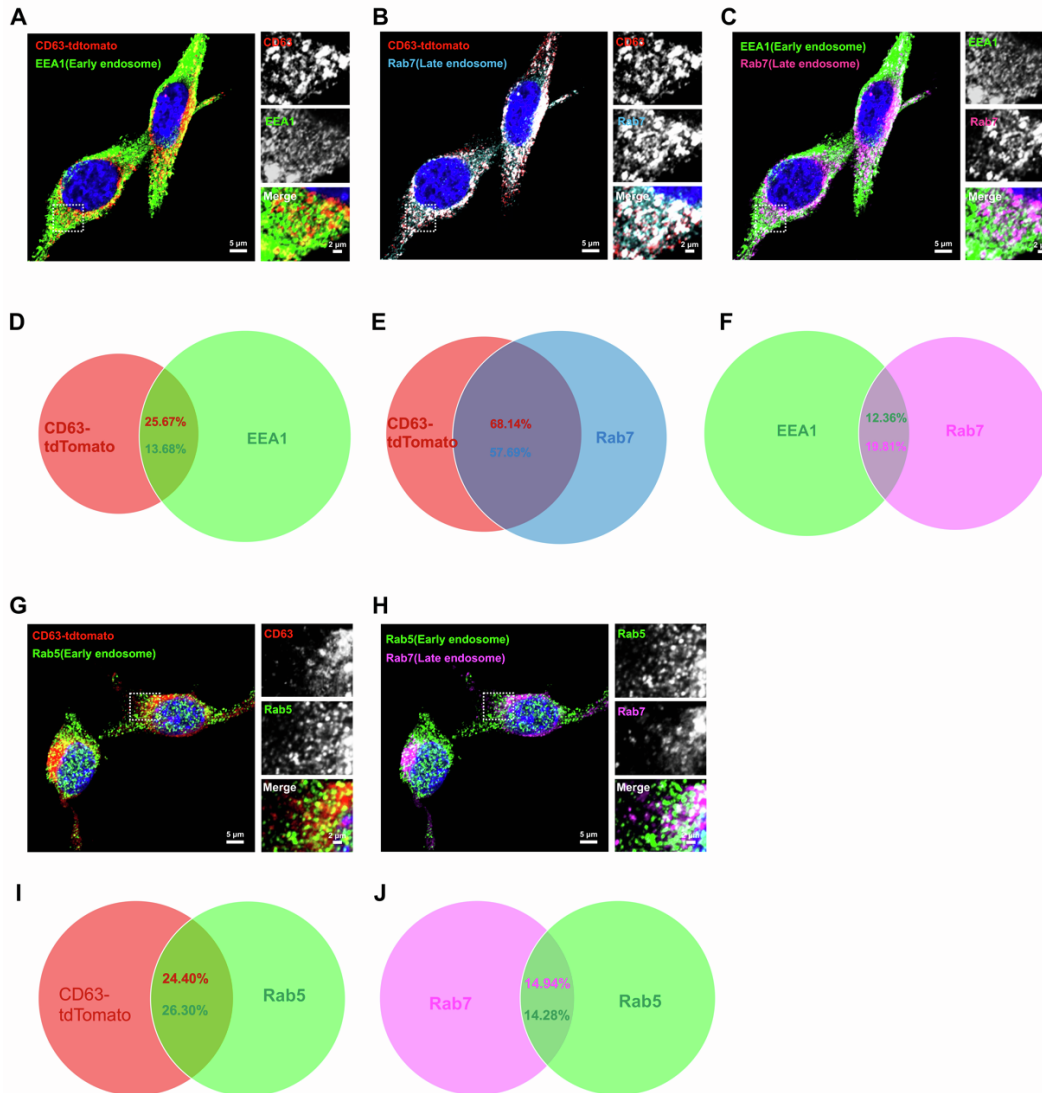

**Supplemental Figure S1. Confocal microscopic imaging of CD63-tdTomato with endosomal markers in tdTomato-CD63<sup>+</sup> BV-2 cells.** Related to Figure 1. BV-2 cell clone stably expressing CD63-tdTomato (red) is fixed and immunolabeled for EEA1 or Rab5 (early endosomal marker, green) and Rab7 (late endosomal marker, cyan/purple). The fluorescent images were captured using laser-scanning confocal microscopy (Zeiss 880 AiryScan with 63x objective lens and zoom in 2.0).

A, D: CD63-tdTomato co-localizes limitedly with EEA1.

B, E: CD63-tdTomato co-localizes partially with Rab7.

C, F: EEA1 and Rab7 predominantly mark separate organelles.

G, I: CD63-tdTomato co-localizes limitedly with Rab5. H, J: Rab5 and Rab7 predominantly mark separate organelles.

D-F, I, J: Venn diagrams based on co-localization analysis of labeling combinations in A-C, G-H. Circle size is proportional to total dots detected for a protein, overlap to number of co-localized dots. Images were analyzed by dot detection in two or three channels, after which overlapping dots were classified as colocalized particles.

Percentages represent the co-localized fraction of the correspondingly colored protein. See methods for a more detailed description of the analysis, see Supplemental Table S5 for standard deviations, cell numbers. Scale bars 5μm in larger images, 2μm in insets. Total 20 cells were analyzed in D-F in and 32 cells in I, J.

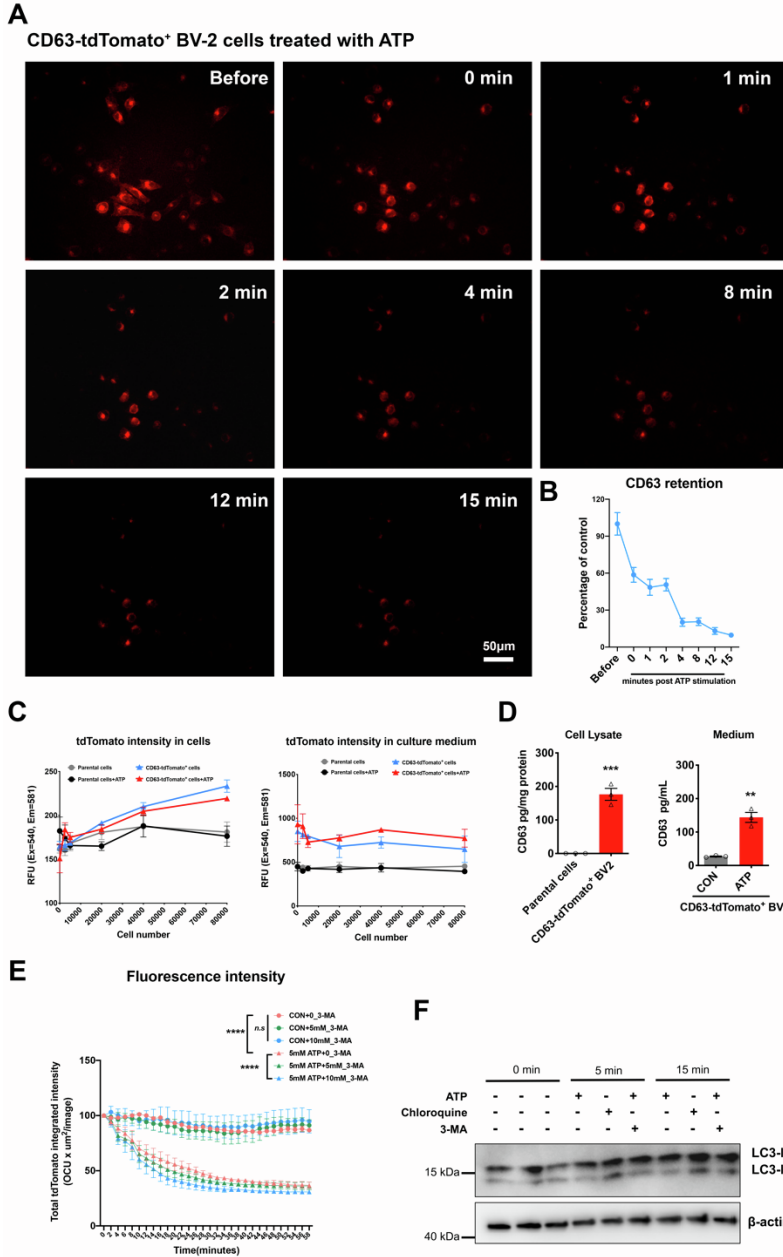

**Supplemental Figure S2. Fluorescence intensity change in a tdTomato-CD63 BV-2 stable cell line upon ATP stimulation.** Related to Figure 1.

(A) Time course of tdTomato-CD63 signal decline. Scale bar: 50 $\mu$ m.

(B) Quantification of tdTomato-CD63 fluorescence signal in the time-course decline. Total 16 cells were analyzed.

(C) Quantification of fluorescence signals in the cell and culture medium with or without ATP stimulation. n=3 independent experiments.

(D) CD63 ELISA analysis of cell lysates and culture medium with or without ATP stimulation. n=3 independent experiments.

(E) Monitoring the fluorescence signal in cells with or without ATP stimulation or treated with the autophagy inhibitor 3-MA for 1 h. n=3 independent experiments.

(F) Representative immunoblots of the typical protein marker LC3 for autophagy in the cell lysate with or without ATP stimulation, or under the condition with the autophagy inhibitor 3-MA.

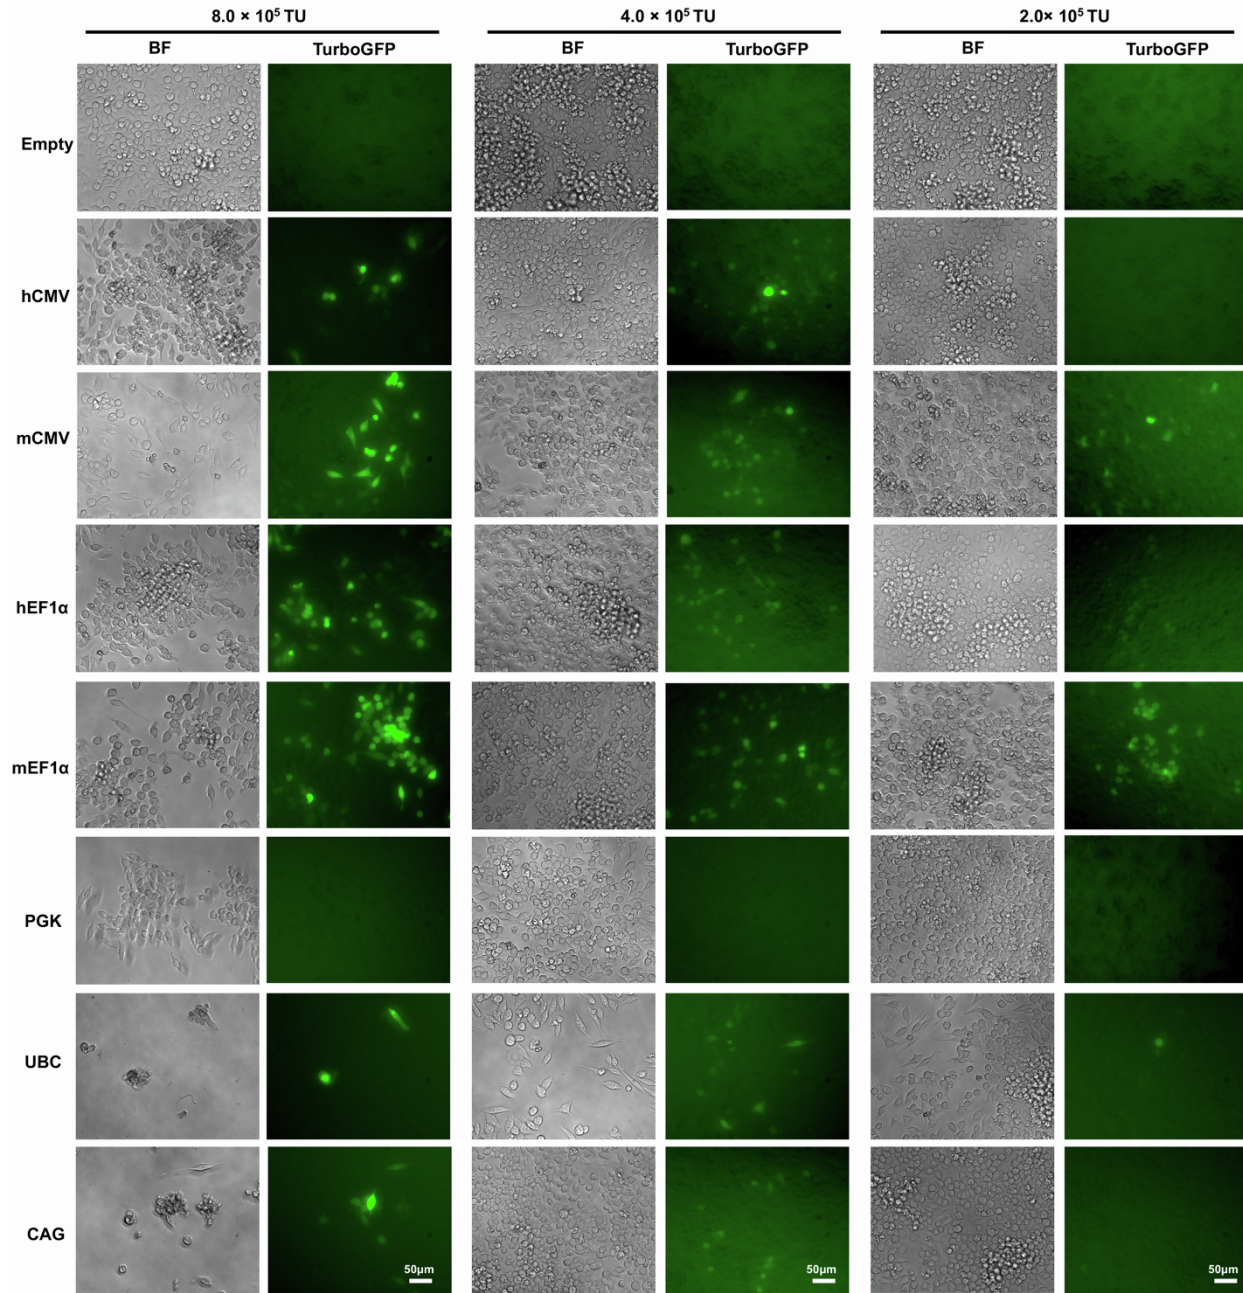

**Supplemental Figure S3. Identifying the optimal promoter for BV-2 cells.** Related to Figure 2.

BV-2 cells were cultured in 96-well plate (3,000 cell/well) for 1 d. Then, 30  $\mu$ L of base medium with 2x Polybrene and serum was added to a Virus plate (25  $\mu$ L/well), then added to BV-2 cell culture medium. Cells were incubated with a gradient concentration ( $0.25 \times 10^5$ – $8.0 \times 10^5$  TU) of lentivirus overnight, and supplemented with growth medium (100  $\mu$ L). Cells were visually inspected and TurboGFP fluorescence intensity was assessed daily for 48 to 96 h. Promotor mEF1 $\alpha$  showed the strongest activity in the BV-2 cell line.



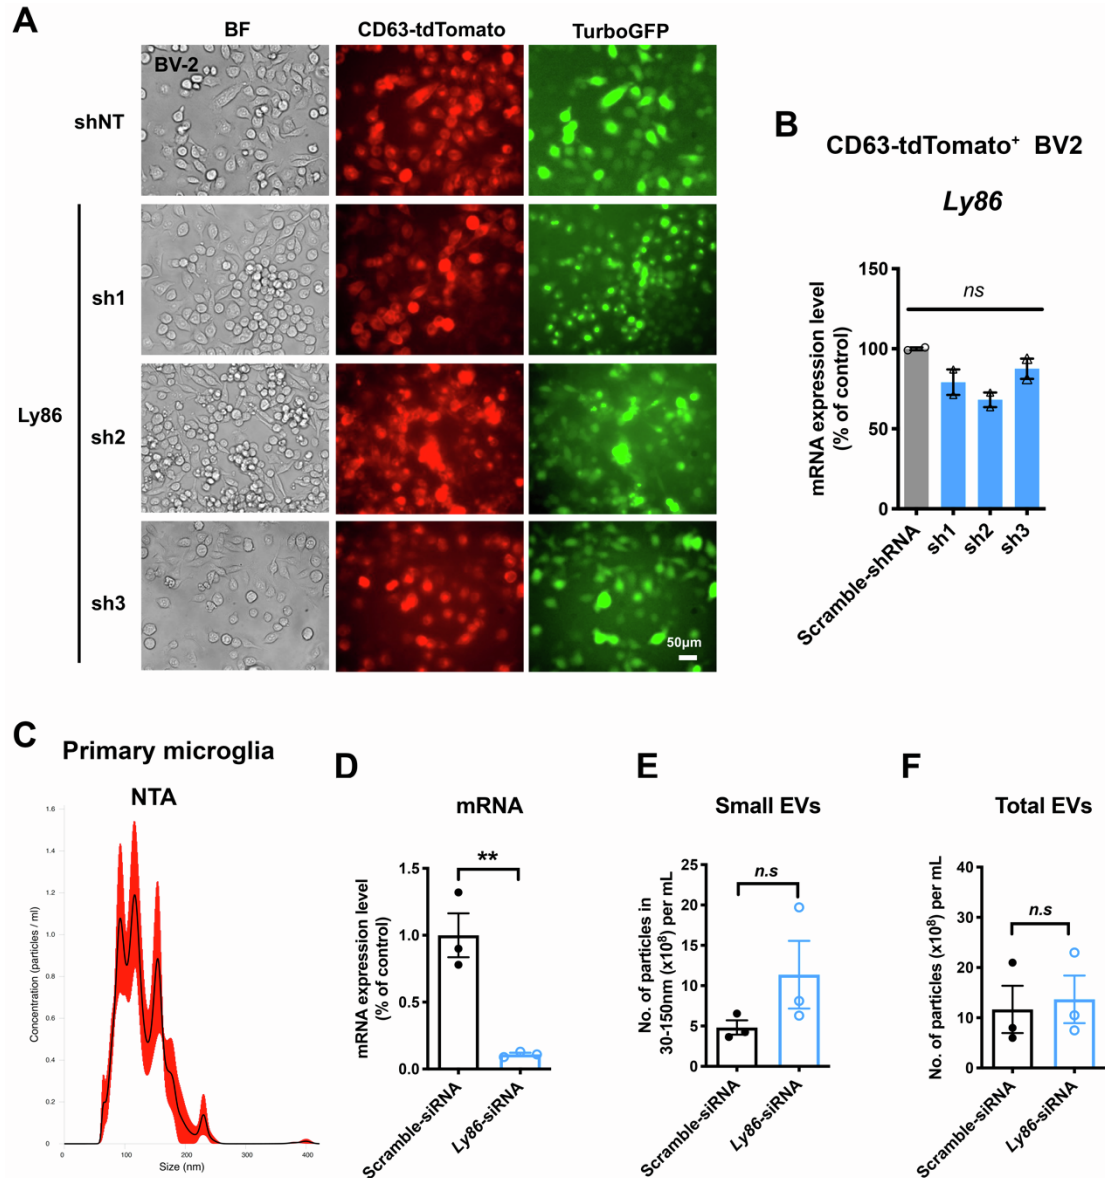

**Supplementary Figure S4. Knockdown of Ly86 in primary microglia but not in BV-2 cells.** Related to Figures 4 and 5.

(A) CD63-tdTomato<sup>+</sup> BV-2 cells were transfected with three lentivirus packaged shRNAs targeting Ly86.

(B) mRNA levels of Ly86 in BV-2 cells after transfection with shRNAs. n=2 independent experiments.

(C-E) Particle distribution (C), specific mRNA levels (D), small EVs (E), and total EVs (F) secretion in primary microglia transfected with Ly86 siRNAs. n=3 independent experiments.

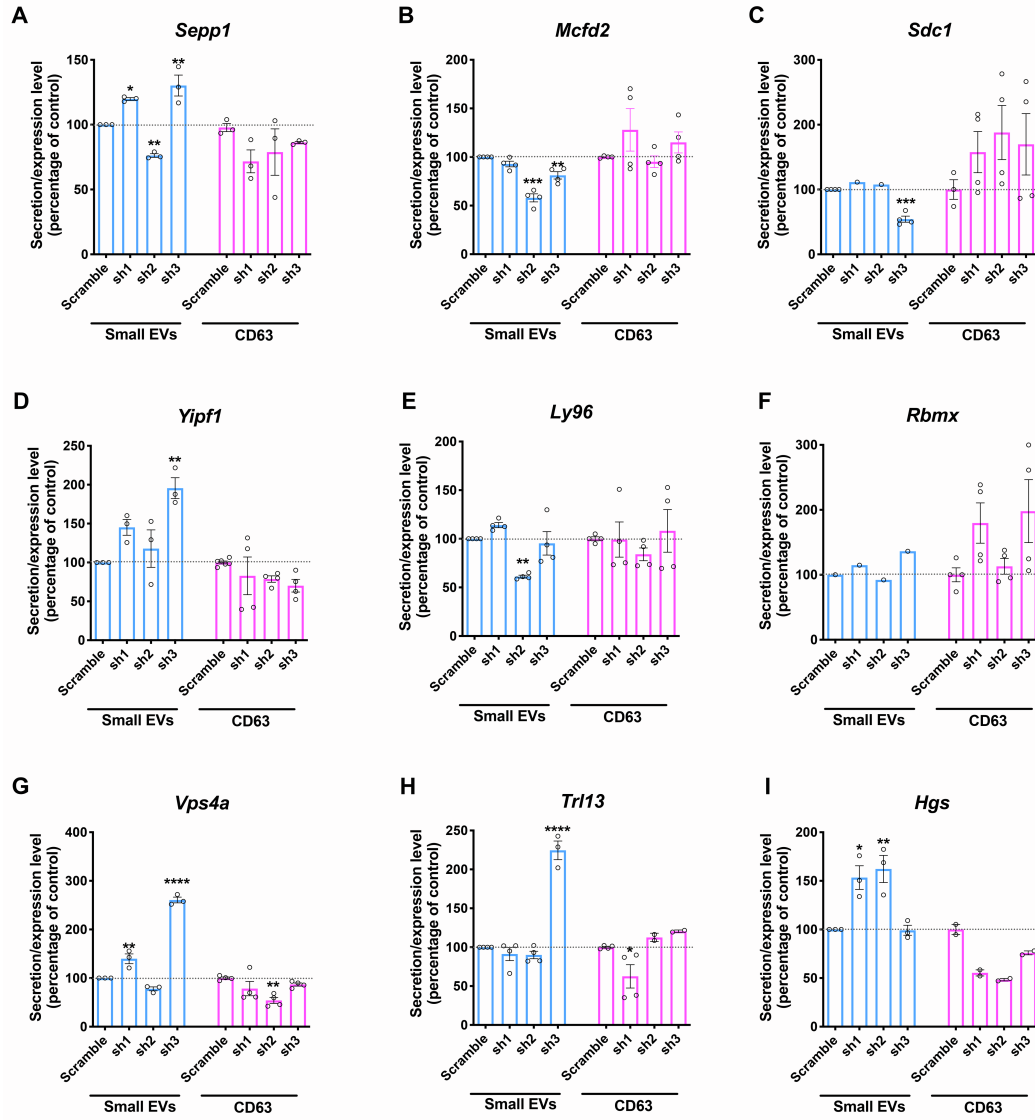

**Supplementary Figure S5. Limit effect of potential hits on EV release under physiological condition.** Related to Figure 4.

(A-I) Small EVs and CD63 secretion in cells transduced with lentiviral shRNA clones targeting *Sepp1* (A), *Mcfd2* (B), *Sdc1* (C), *Yipf1* (D), *Ly96* (E), *RbmX* (F), *Vps4a* (G), *Tlr13* (H), or *Hgs* (I). \*  $p < 0.05$ , \*\*  $p < 0.01$ , \*\*\*  $p < 0.001$  and \*\*\*\*  $p < 0.0001$  compared with scramble-shRNA group, as determined by one-way ANOVA (alpha = 0.05) and Tukey's *post-hoc*; n=3-4 independent experiments, graphs indicate mean  $\pm$  s.e.m.

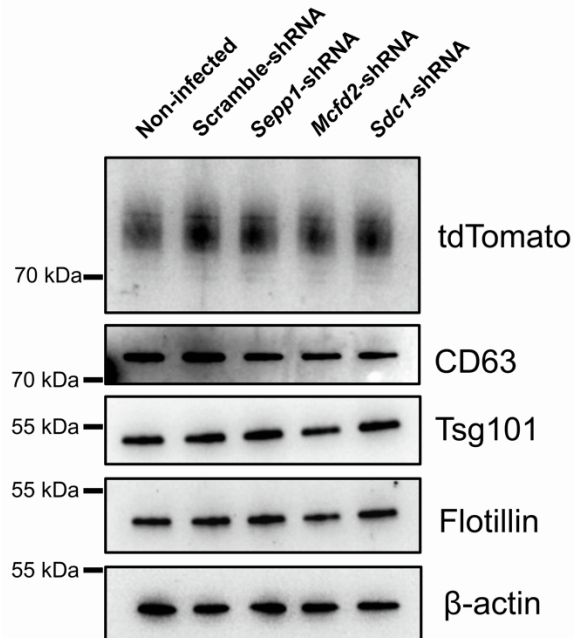

**Supplementary Figure S6. Immunoblotting of EV markers in the EV fraction isolated from culture conditional medium in lentiviral shRNA infected cell clones.** Related to Figure 4. tdTomato, CD63, Tsg101, flotillin and  $\beta$ -actin was tested by immunoblotting using qEV-isolated EV fraction from clonal cell lines after lentiviral infection of shRNA targeting scramble, *Sepp1*, *Mcfd2* or *Sdc1* and single cell sorting.



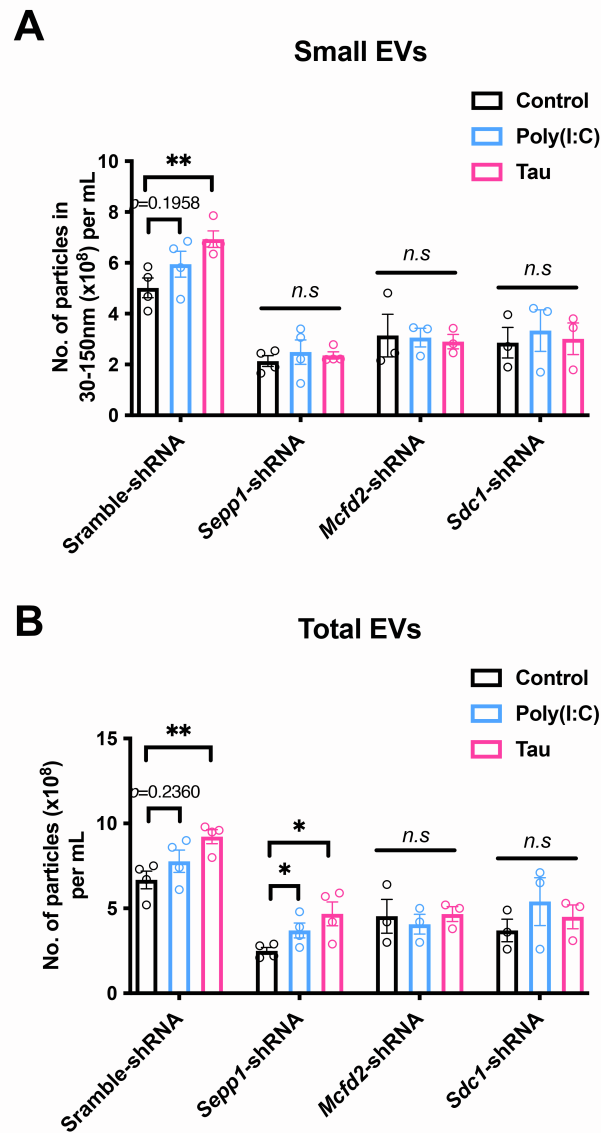

**Supplementary Figure S7. The effect of silencing target genes on EV release after stimulation of gene-silenced BV-2 reporter cells with (poly(I:C) or tau aggregates.** Related to Figure 6. Quantification of secreted small EVs (A) and total EVs (B) after treatment of gene-silenced BV-2 reporter cells with 20  $\mu\text{g}/\text{mL}$  high molecular weight poly(I:C) or 10  $\mu\text{g}/\text{mL}$  tau aggregates. Two-tailed *t*-test, \* $p < 0.05$ , \*\* $p < 0.01$ , \*\*\* $p < 0.001$ , *n.s.*, no statistical significance,  $n = 3-4$  independent experiments.
